# Supplementary material for: The ER folding sensor UGGT1 acts on TAPBPR-chaperoned peptide-free MHC I
Source: eLife journal article supplement (doi:10.7554/elife.85432), 2023-06-22

Figure 1—source data 3

Original unedited SDS-PAGE gel of UGGT1-Sep15, Figure 1D

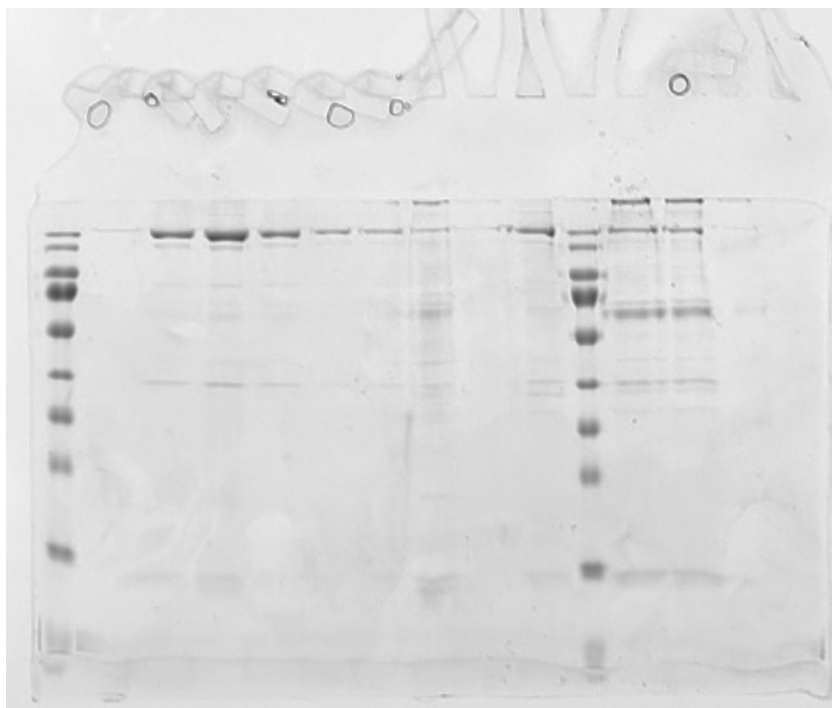

Original uncropped SDS-PAGE gel of UGGT1-Sep15 with highlighted relevant bands, Figure 1D

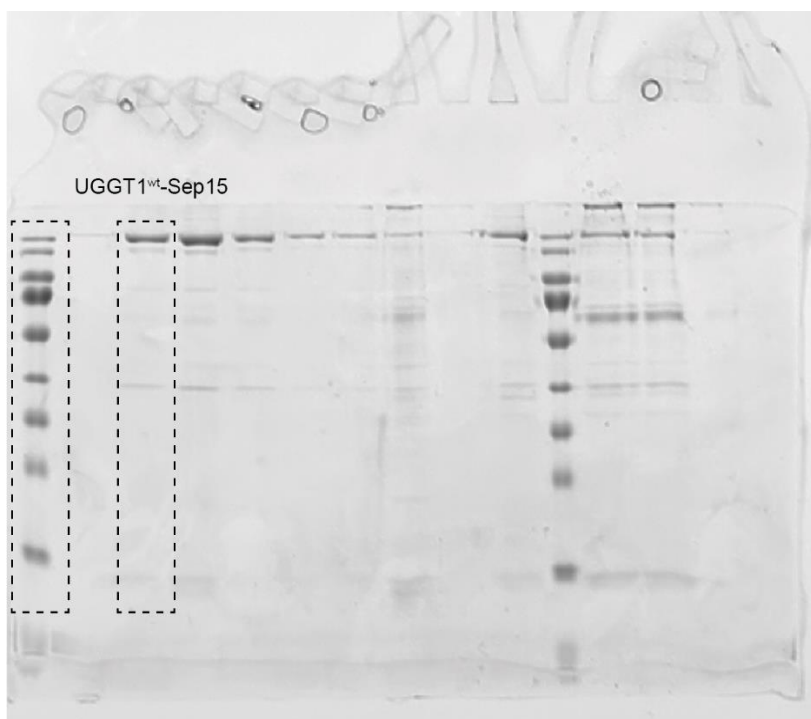

Supplement: supp [file elife-85432-supp-v1.zip]
