# Supplementary material for: The ER folding sensor UGGT1 acts on TAPBPR-chaperoned peptide-free MHC I
Source: eLife journal article supplement (doi:10.7554/elife.85432), 2023-06-22

Figure 1—figure supplement 2—source data 1

Original unedited anti-UGGT1 immunoblot, Figure 1—figure supplement 2A

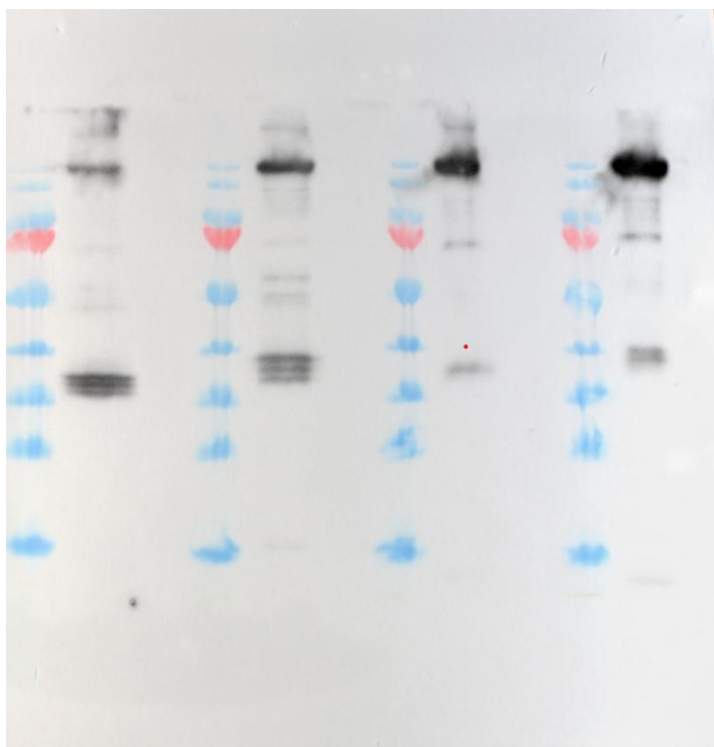

Original uncropped anti-UGGT1 immunoblot with highlighted relevant bands, Figure 1—figure supplement 2A

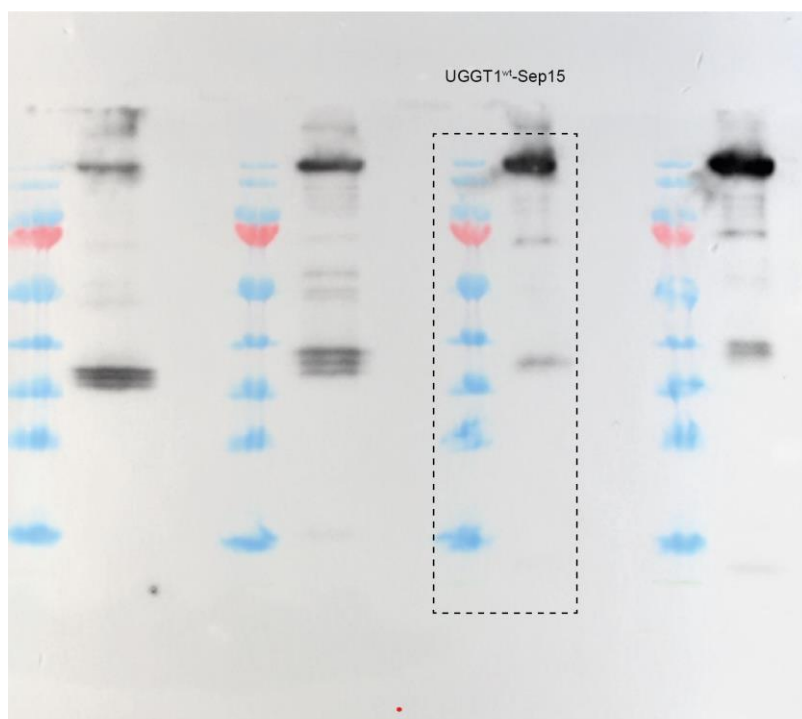

Supplement: supp [file elife-85432-supp-v1.zip]
