# Supplementary material for: The ER folding sensor UGGT1 acts on TAPBPR-chaperoned peptide-free MHC I
Source: eLife journal article supplement (doi:10.7554/elife.85432), 2023-06-22

Figure 4—source data 1

Original unedited SDS-PAGE gel of pull-down experiment with UGGT1<sup>wt</sup>, Figure 4C

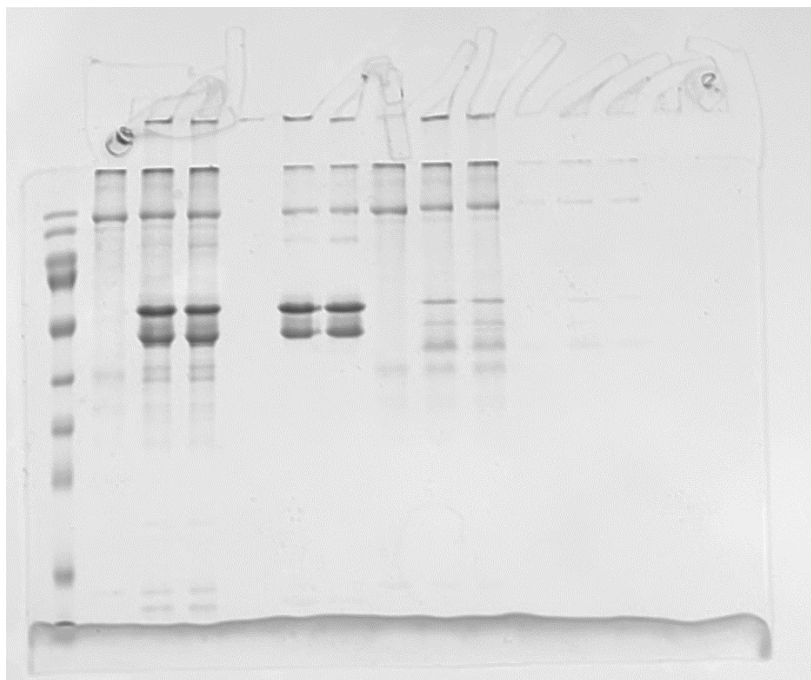

Original uncropped SDS-PAGE gel of pull-down experiment with UGGT1<sup>wt</sup> with highlighted relevant bands, Figure 4C

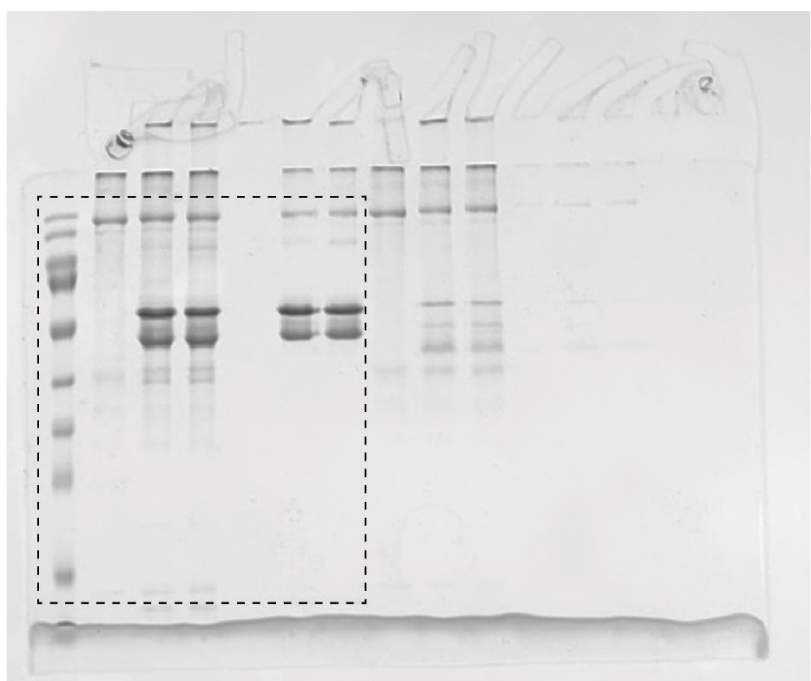

Supplement: supp [file elife-85432-supp-v1.zip]
