# Supplementary figures and images for: The ER folding sensor UGGT1 acts on TAPBPR-chaperoned peptide-free MHC I
Source: eLife journal article supplement (doi:10.7554/elife.85432), 2023-06-22

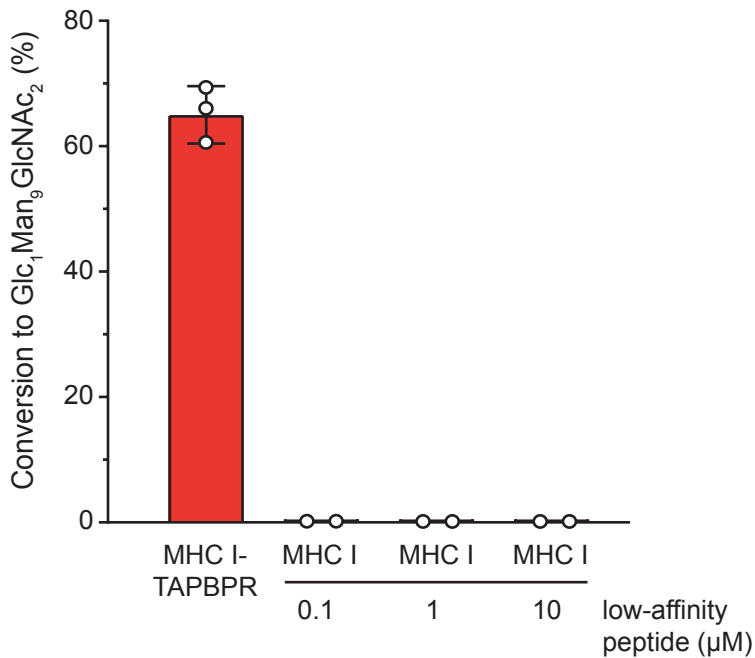

Supplement: supp [file elife-85432-supp-v1.zip]

**A**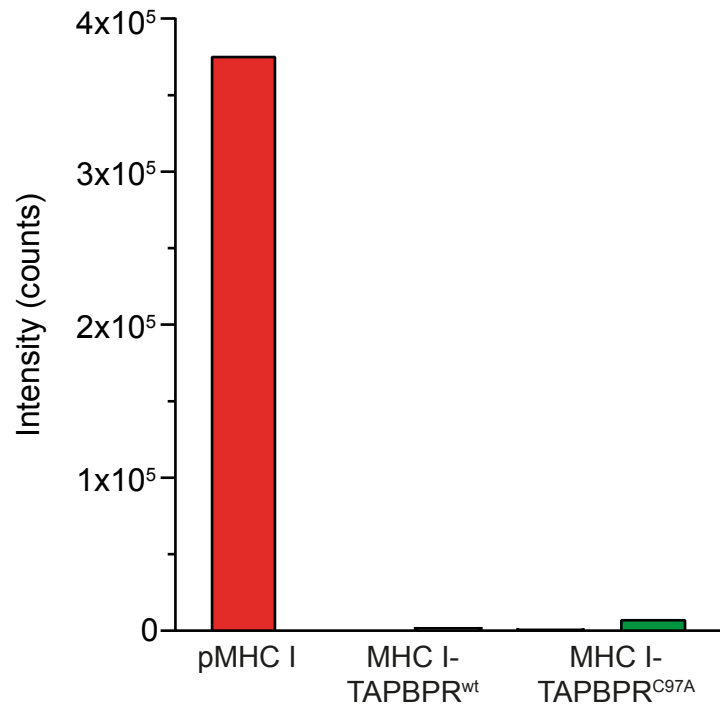

Peptide affinity:    high                      low    high                      low    high

**B**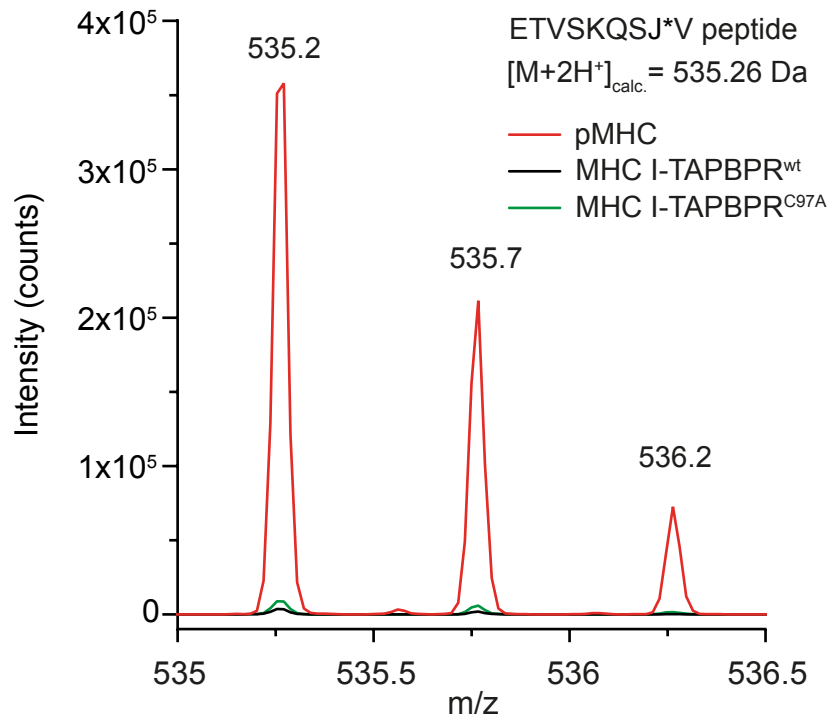

Supplement: supp [file elife-85432-supp-v1.zip]

**A**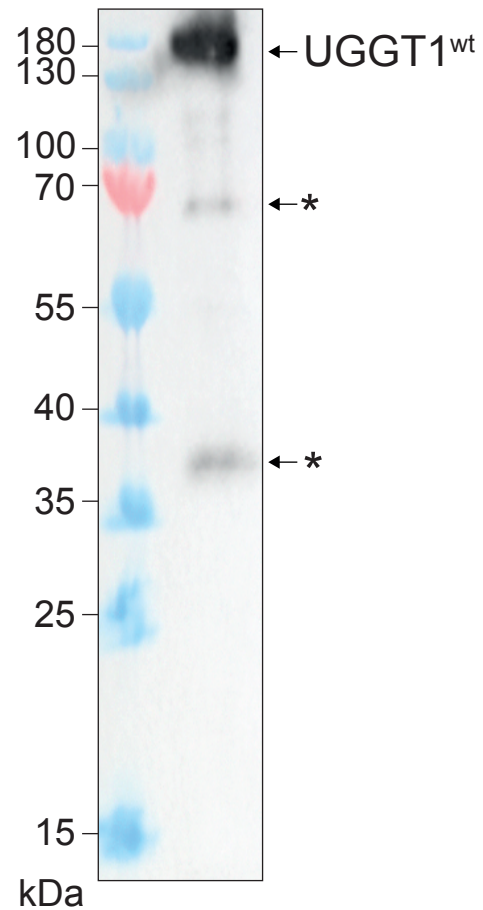**B**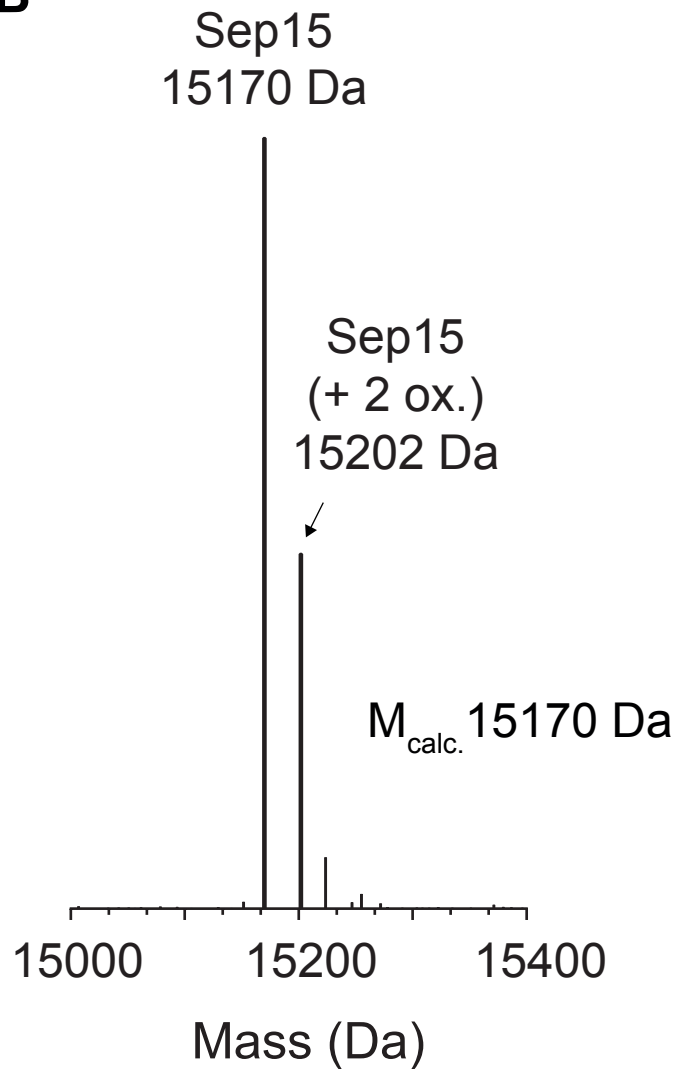**C**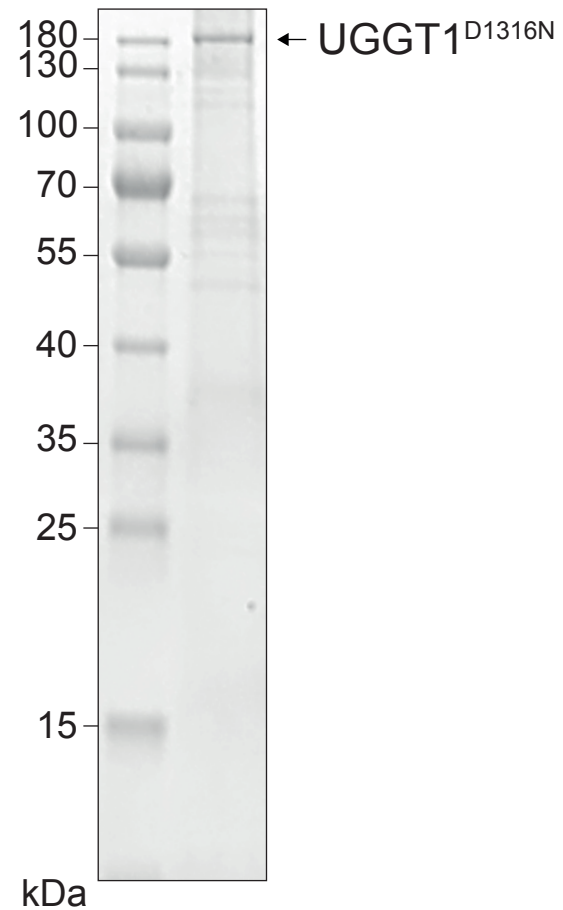

Supplement: supp [file elife-85432-supp-v1.zip]

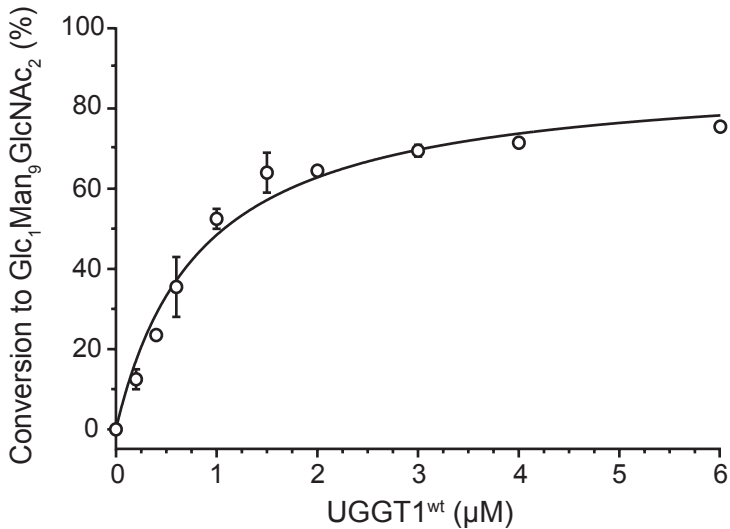

Supplement: supp [file elife-85432-supp-v1.zip]

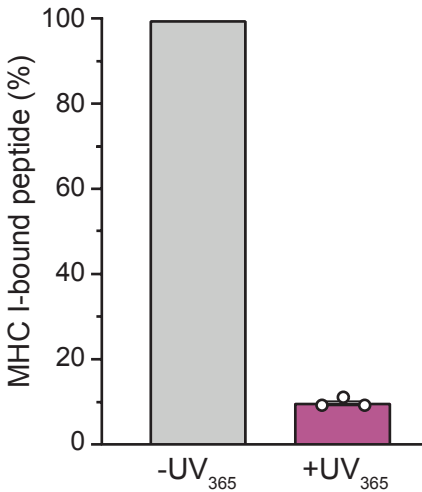

Supplement: supp [file elife-85432-supp-v1.zip]

**A**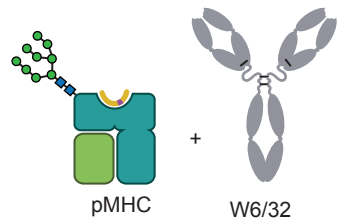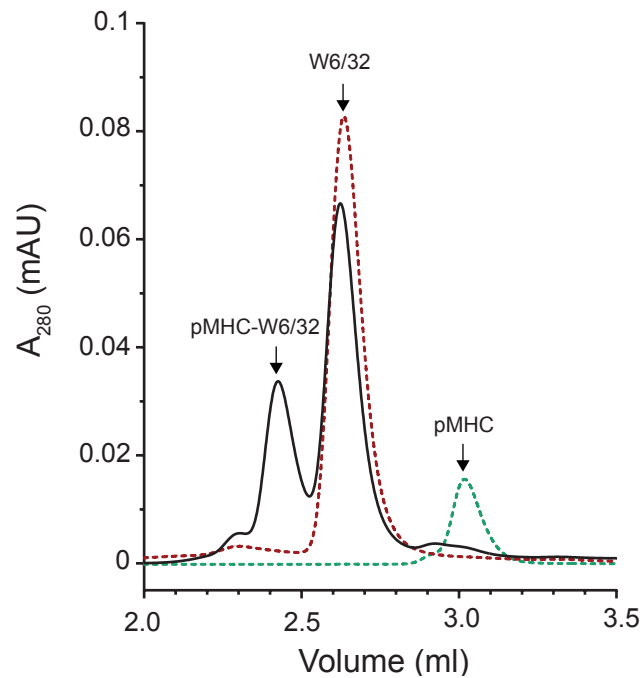**B**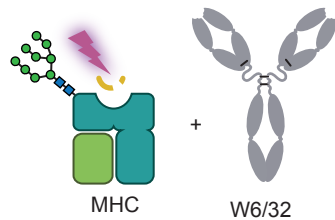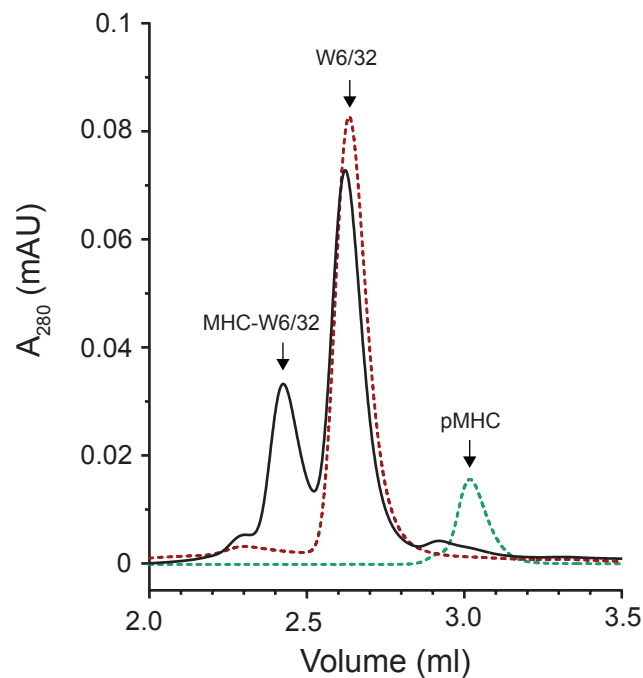**C**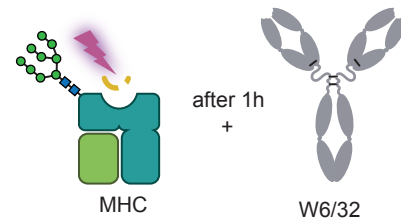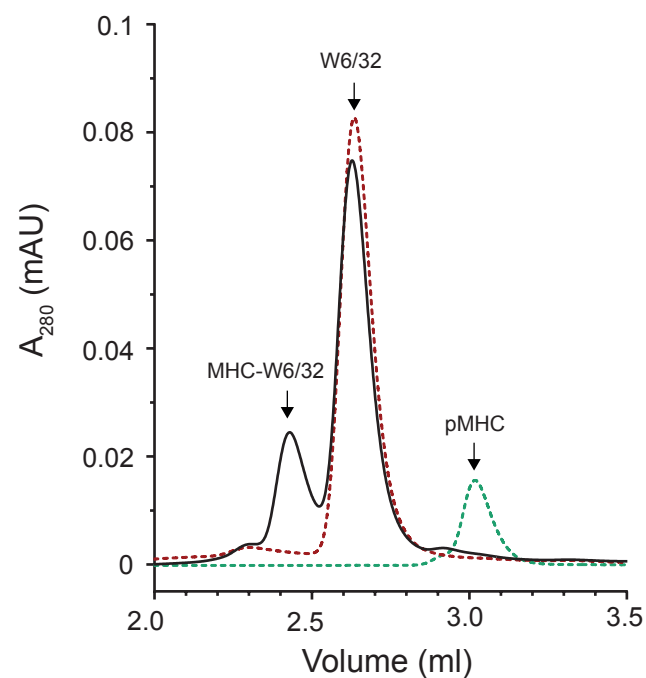

Supplement: supp [file elife-85432-supp-v1.zip]

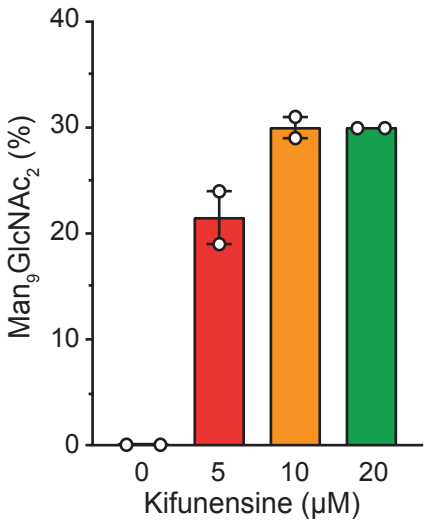

Supplement: supp [file elife-85432-supp-v1.zip]
